# Supplementary material for: Aberrant gene activation in synovial sarcoma relies on SSX specificity and increased PRC1.1 stability
Source: PubMed Central journal article supplement (PMC10643139; doi:10.1038/s41594-023-01096-3), 2023-09-21

Extended Figure 4c

SS18-SSX1

PCGF1

$\beta$ -Actin

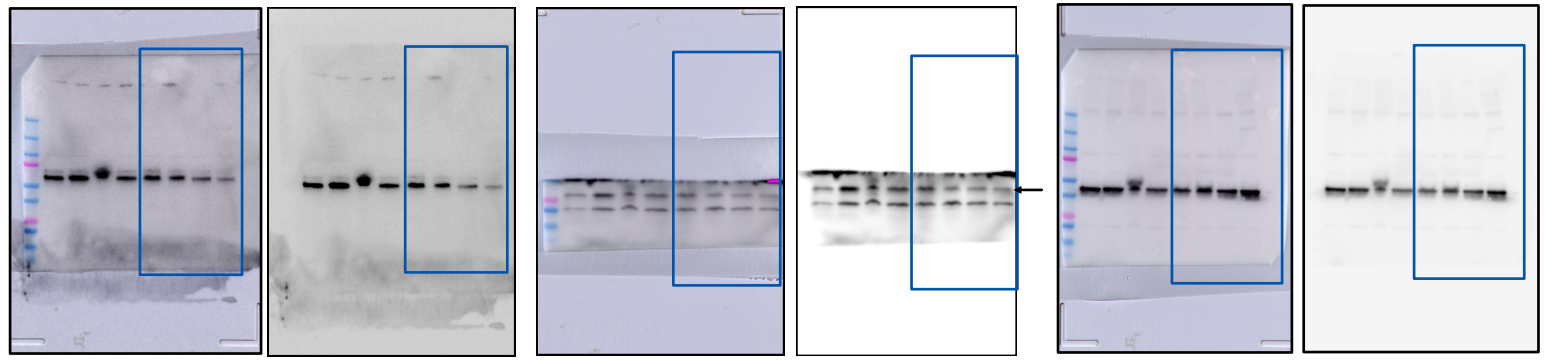

Extended Figure 4f

BCOR/PCGF1

$\beta$ -Actin

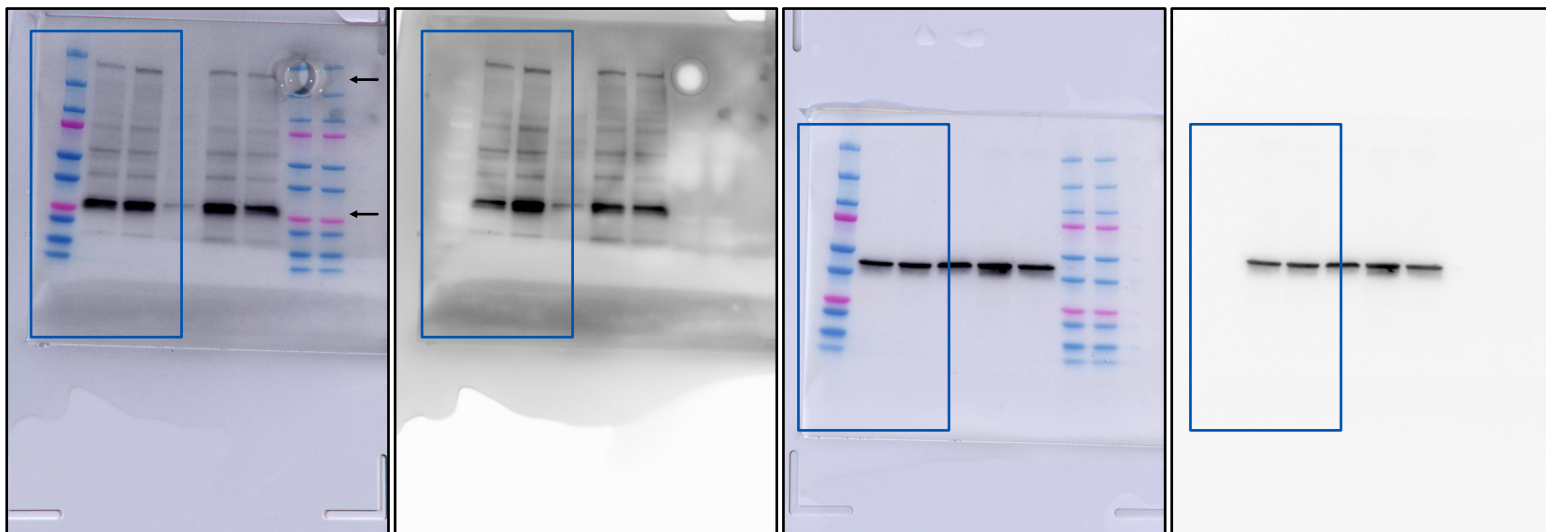

Extended Figure 4g

BCOR

PCGF1

$\beta$ -Actin

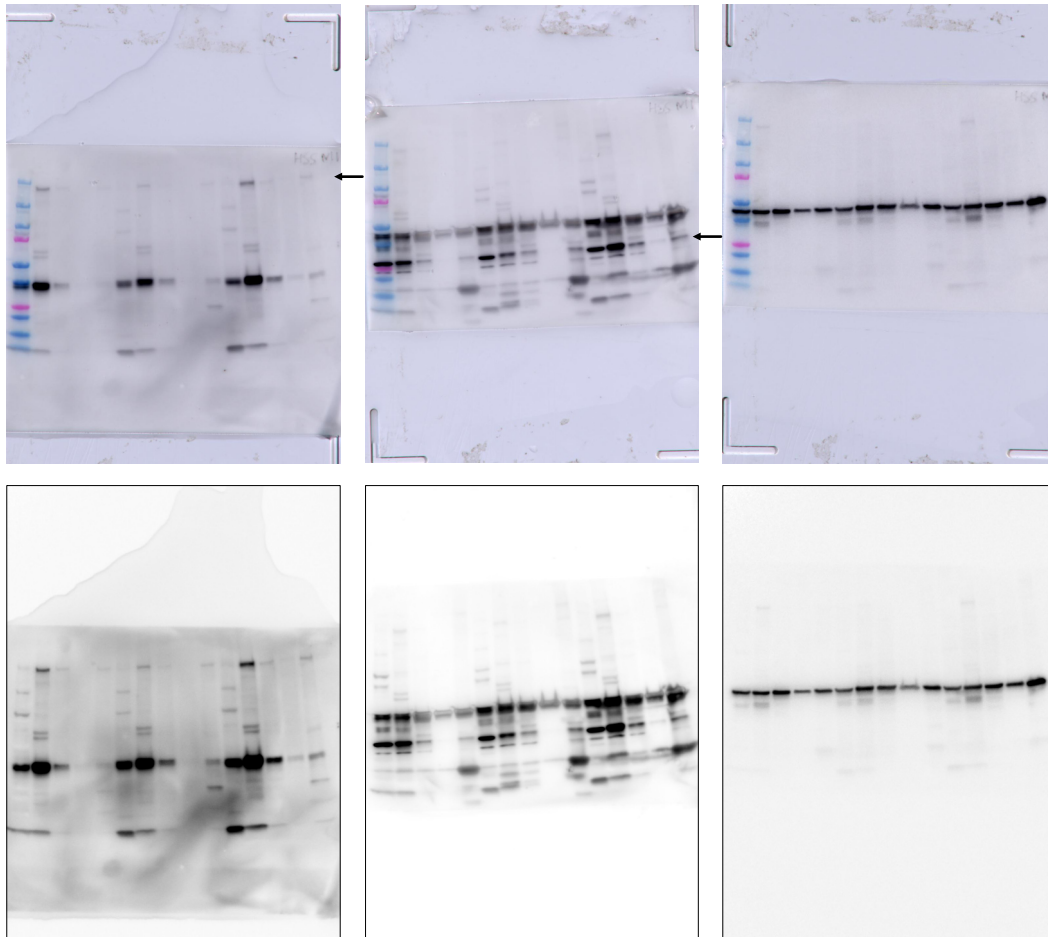

Supplement: 41594_2023_1096_MOESM18_ESM.pdf [file 41594_2023_1096_MOESM18_ESM.pdf]
